# Supplementary material for: A comprehensive approach to assess the costs of renal replacement therapy for end-stage renal disease in France: the importance of age, diabetes status, and clinical events
Source: Springer Nature journal article supplement (doi:10.1007/s10198-016-0801-6), 2016-05-05
Supplement: MOESM1 [file 10105310]

# **Online-only material**

Suppl Table 1: Distribution of the mean monthly expense headings for **the last month** of life for 4068 **deceased** patients, by age and diabetes status (in euros)

|  | **N** | **Total**  **€** | **RRT***  **€** | **Other hospitalisation**  **€** | **Transport**  **€** | **Nurse fees**  **€** | **Pharmaceu**  **tical**  **Expenditure**  **€** | **Personal**  **Autonomy**  **Allowances**  **€** | **Laboratory**  **Expenditure**  **€** | **Medical devices**  **€** | **Doctor fees**  **€** | **Health auxiliary**  **€** | **Other**  **€** |
| --- | --- | --- | --- | --- | --- | --- | --- | --- | --- | --- | --- | --- | --- |
| 18-44 years with diabetes | 22 | 14 848 | 1171 | 12 216 | 636 | 47 | 341 | 0 | 139 | 123 | 170 | 3 | 3 |
| 18-44 years without diabetes | 82 | 16 229 | 1043 | 13 807 | 538 | 32 | 251 | 0 | 132 | 60 | 348 | 4 | 15 |
| 45-69 years with diabetes | 447 | 13 212 | 1611 | 9496 | 848 | 127 | 208 | 3 | 204 | 160 | 526 | 16 | 14 |
| 45-69 years without diabetes | 688 | 13 027 | 1427 | 10 036 | 659 | 44 | 247 | 4 | 144 | 72 | 381 | 9 | 5 |
| 70+ years with diabetes | 937 | 10 123 | 1595 | 6685 | 752 | 178 | 141 | 2 | 175 | 107 | 464 | 18 | 8 |
| 70+ years without diabetes | 1892 | 10 001 | 1672 | 6629 | 725 | 99 | 128 | 2 | 175 | 91 | 455 | 16 | 10 |
| **Total** | **4068** | **11 046** | **1591** | **7708** | **729** | **109** | **163** | **2** | **172** | **99** | **448** | **15** | **9** |

*cost related to dialysis procedure or hospitalisation related to renal graft rejection or follow-up.
